# Supplementary material for: Individual and Combined Effects of Booting and Flowering High-Temperature Stress on Rice Biomass Accumulation
Source: MDPI journal article supplement (doi:10.3390/plants10051021), 2021-05-20
Supplement: s1 [file s1]

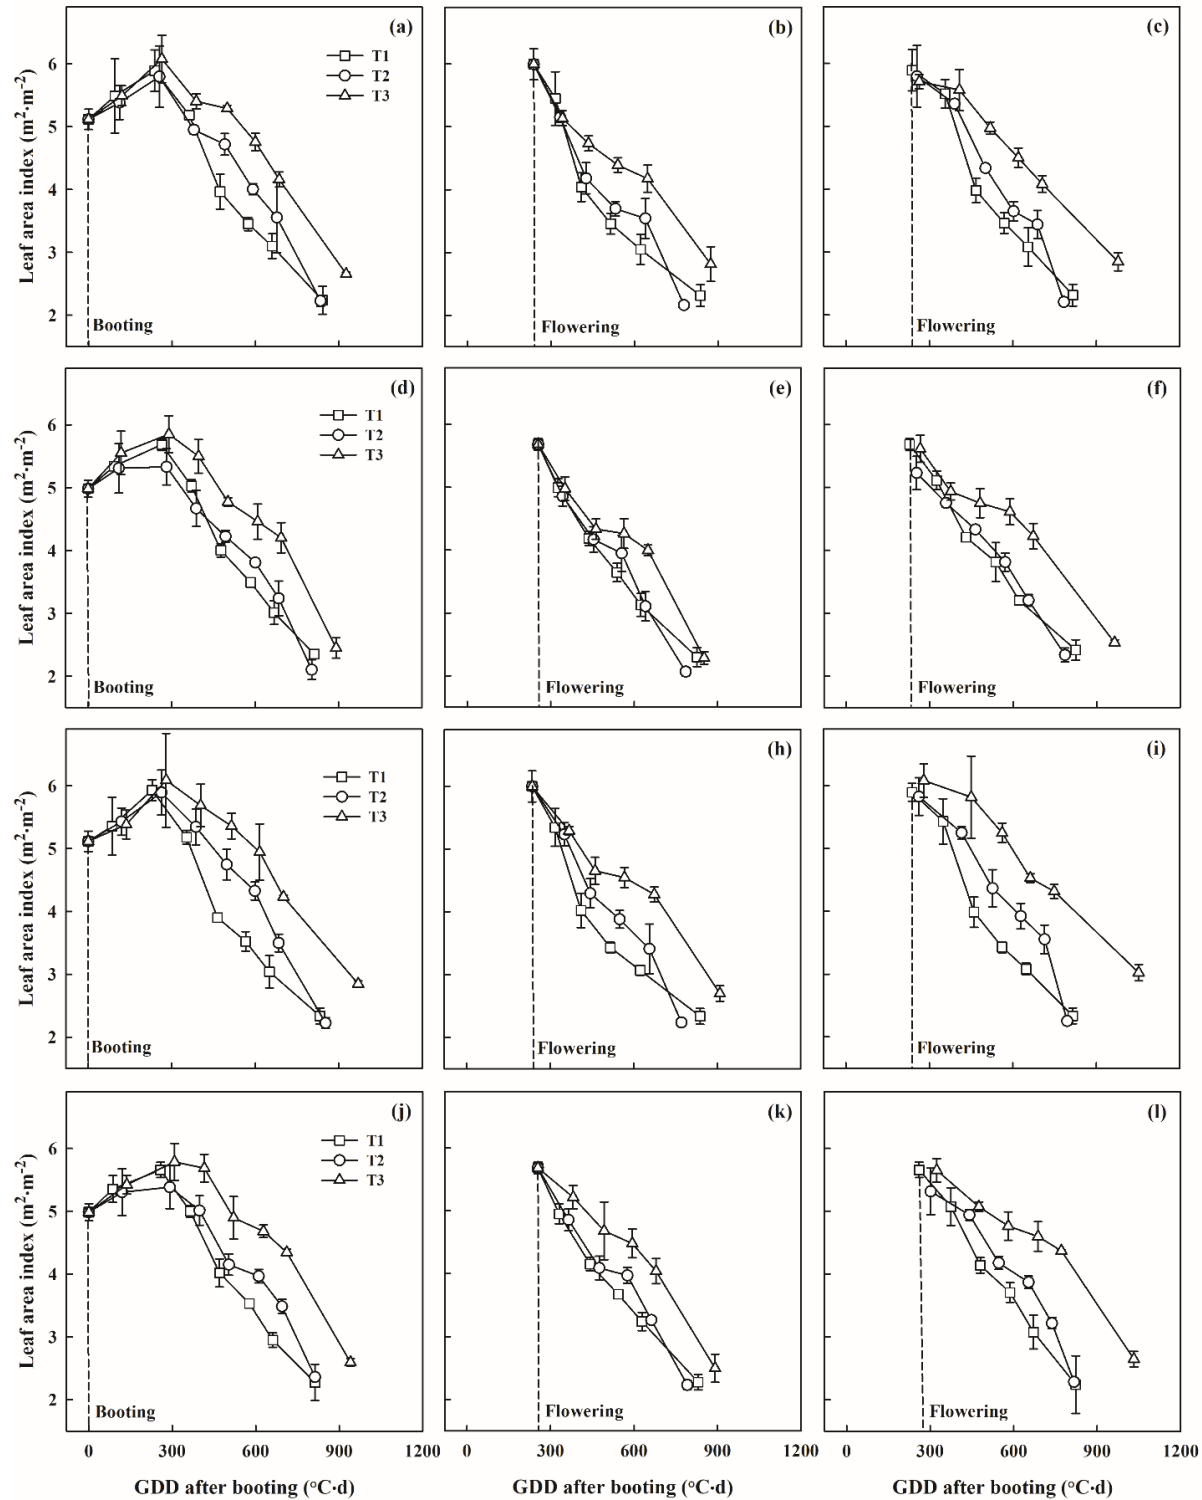

**Figure S1.** The measured leaf area index (LAI) under different high-temperature treatments at booting, flowering, and combined stages in 2016. (a-c): Huaidao-5 under 2 days' duration ( $D_2$ ) at booting and flowering stages and under 4 days ( $D_{2+2}$ ) at combined stages, respectively; (d-f): Wuyunjing-24 under 2 days' duration ( $D_2$ ) at booting and flowering stages and under 4 days ( $D_{2+2}$ ) at combined stages, respectively; (g-i): Huaidao-5 under 4 days' duration ( $D_4$ ) at booting and flowering stages and under 8 days ( $D_{4+4}$ ) at combined stages, respectively; (j-l): Wuyunjing-24 under 4 days' duration ( $D_4$ ) at booting and flowering stages and under 8 days ( $D_{4+4}$ ) at combined stages. Vertical bars represent standard deviation of mean.

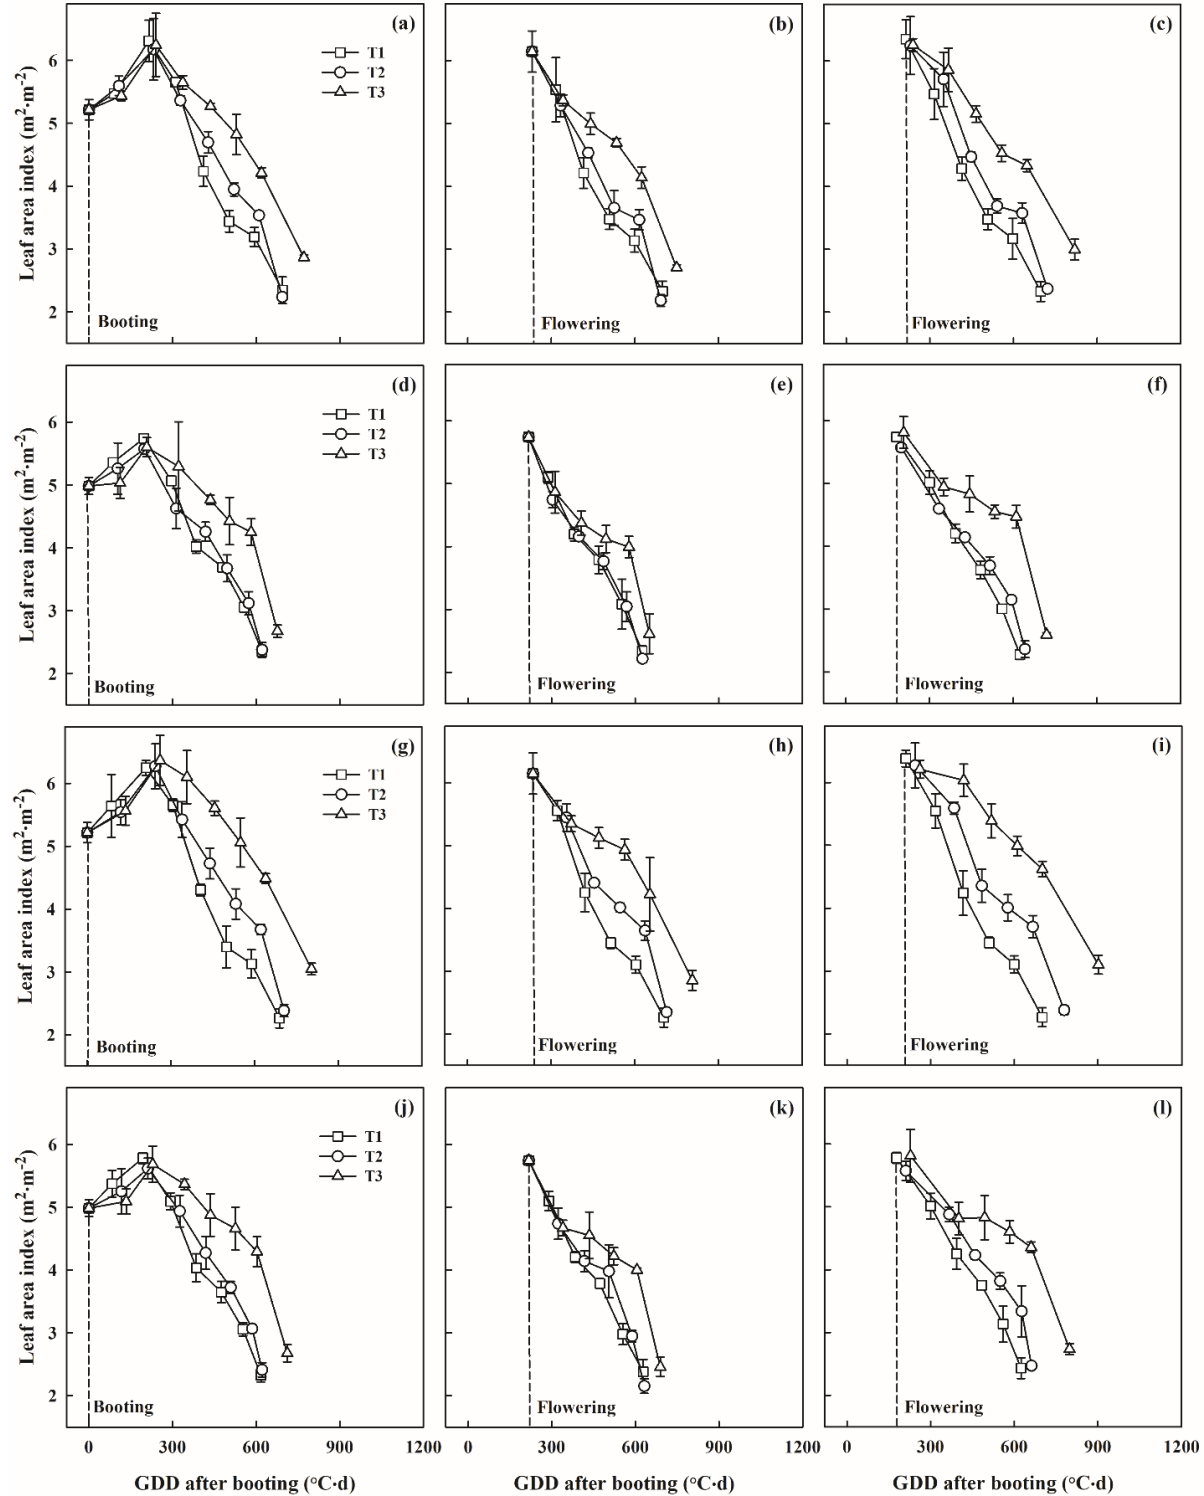

**Figure S2.** The measured leaf area index (LAI) under different high-temperature treatments at booting, flowering, and combined stages in 2017. (a-c): Huaidao-5 under 2 days' duration ( $D_2$ ) at booting and flowering stages and under 4 days ( $D_{2+2}$ ) at combined stages, respectively; (d-f): Wuyunjing-24 under 2 days' duration ( $D_2$ ) at booting and flowering stages and under 4 days ( $D_{2+2}$ ) at combined stages, respectively; (g-i): Huaidao-5 under 4 days' duration ( $D_4$ ) at booting and flowering stages and under 8 days ( $D_{4+4}$ ) at combined stages, respectively; (j-l): Wuyunjing-24 under 4 days' duration ( $D_4$ ) at booting and flowering stages and under 8 days ( $D_{4+4}$ ) at combined stages. Vertical bars represent standard deviation of mean.

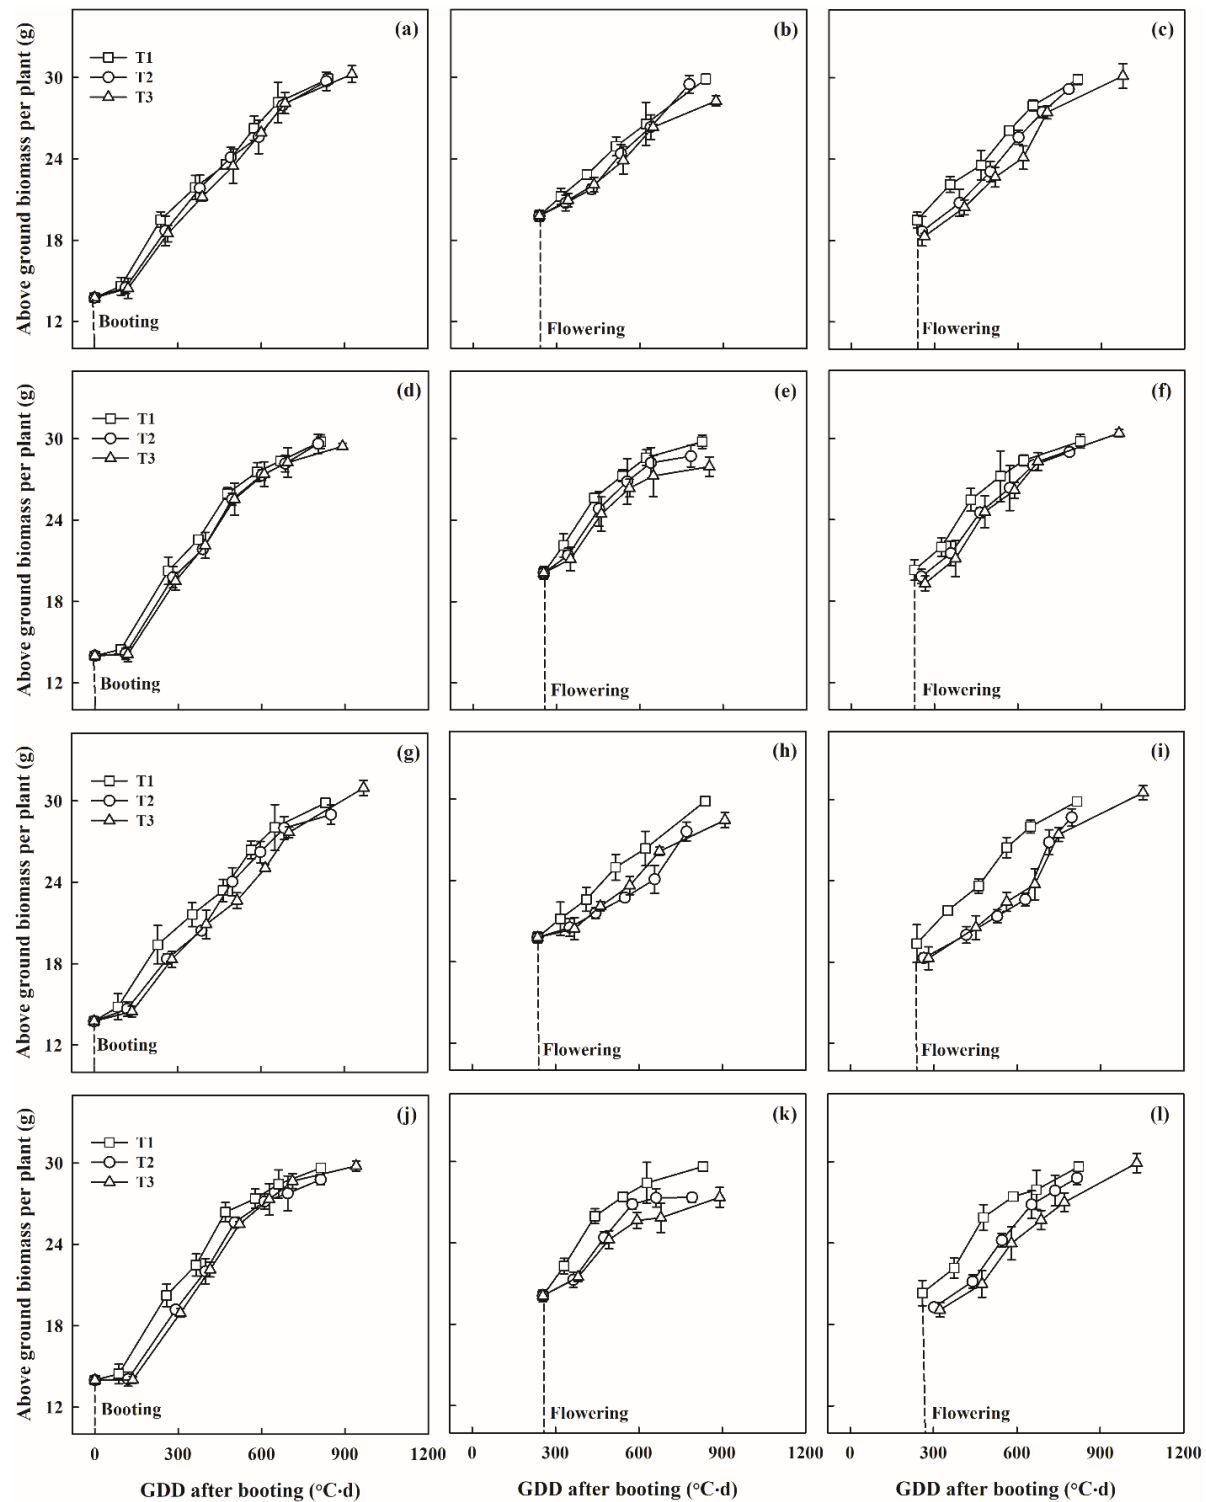

**Figure S3.** The measured aboveground biomass per plant (g) under different high-temperature treatments at booting, flowering, and combined stages in 2016. (a-c): Huaidao-5 under 2 days' duration (D<sub>2</sub>) at booting and flowering stages and under 4 days (D<sub>2+2</sub>) at combined stages, respectively; (d-f): Wuyunjing-24 under 2 days' duration (D<sub>2</sub>) at booting and flowering stages and under 4 days (D<sub>2+2</sub>) at combined stages, respectively; (g-i): Huaidao-5 under 4 days' duration (D<sub>4</sub>) at booting and flowering stages and under 8 days (D<sub>4+4</sub>) at combined stages, respectively; (j-l): Wuyunjing-24 under 4 days' duration (D<sub>4</sub>) at booting and flowering stages and under 8 days (D<sub>4+4</sub>) at combined stages. Vertical bars represent standard deviation of mean.

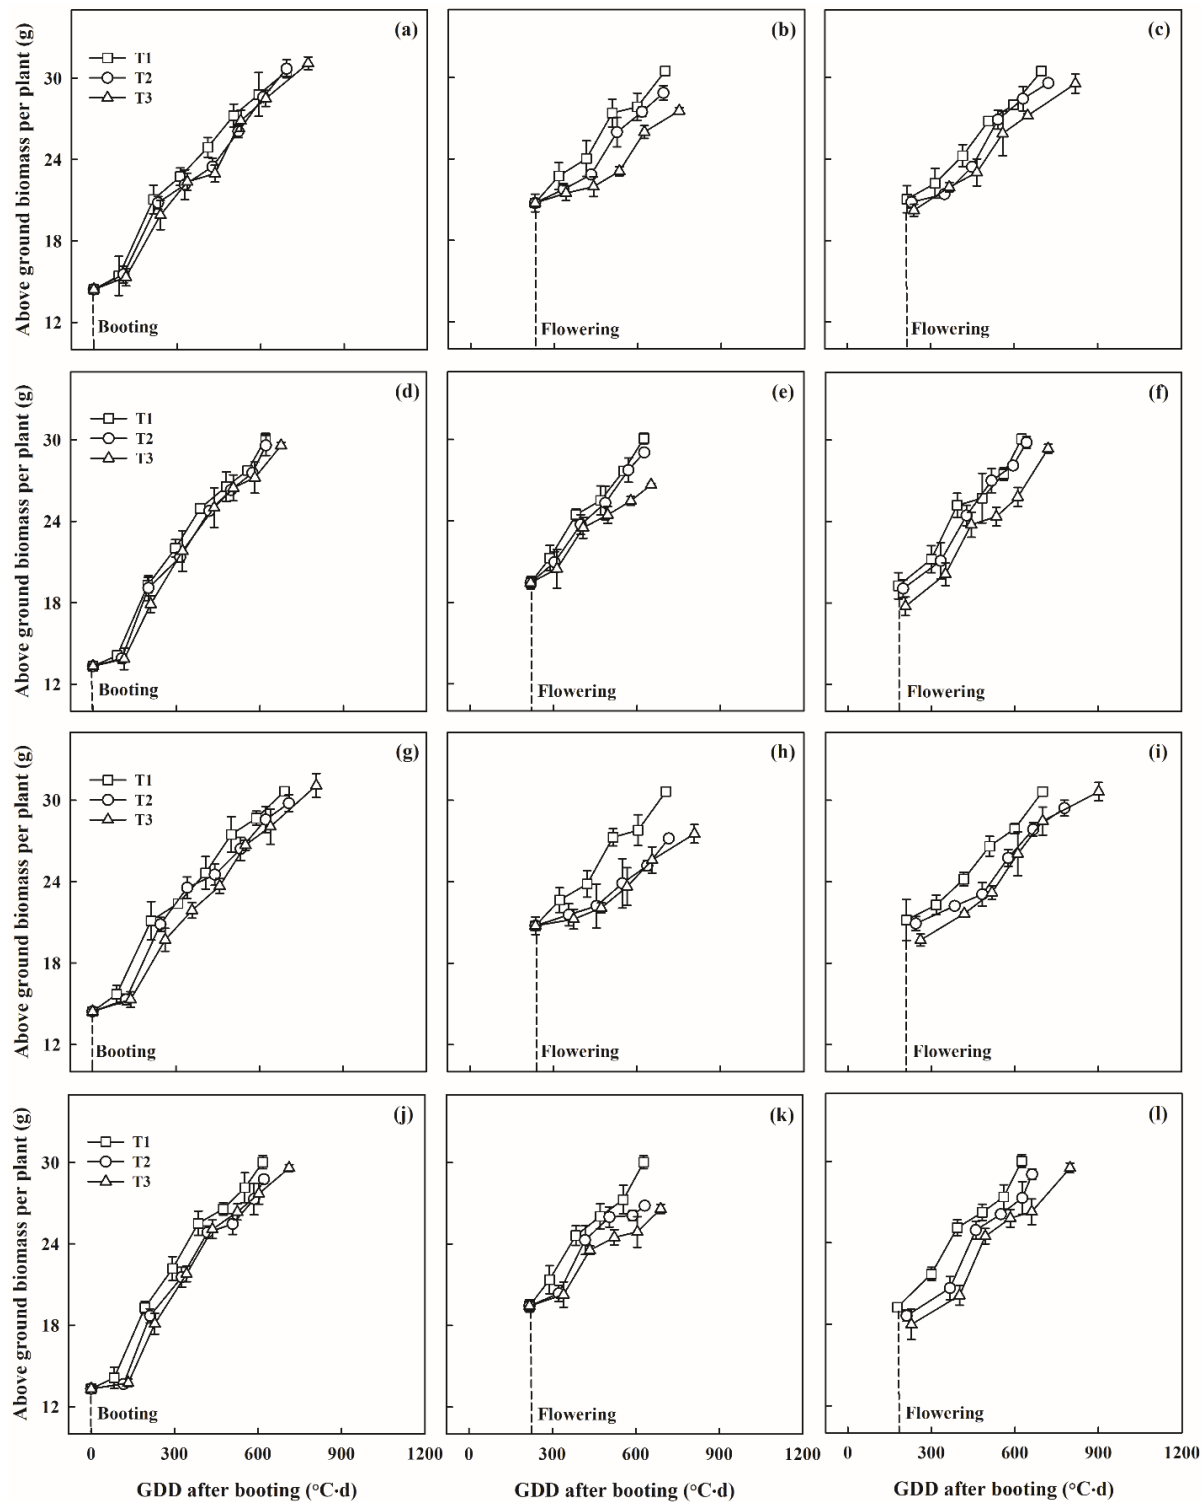

**Figure S4.** The measured aboveground biomass per plant (g) under different high-temperature treatments at booting, flowering, and combined stages in 2017. (a-c): Huaidao-5 under 2 days' duration (D<sub>2</sub>) at booting and flowering stages and under 4 days (D<sub>2+2</sub>) at combined stages, respectively; (d-f): Wuyunjing-24 under 2 days' duration (D<sub>2</sub>) at booting and flowering stages and under 4 days (D<sub>2+2</sub>) at combined stages, respectively; (g-i): Huaidao-5 under 4 days' duration (D<sub>4</sub>) at booting and flowering stages and under 8 days (D<sub>4+4</sub>) at combined stages, respectively; (j-l): Wuyunjing-24 under 4 days' duration (D<sub>4</sub>) at booting and flowering stages and under 8 days (D<sub>4+4</sub>) at combined stages. Vertical bars represent standard deviation of mean.

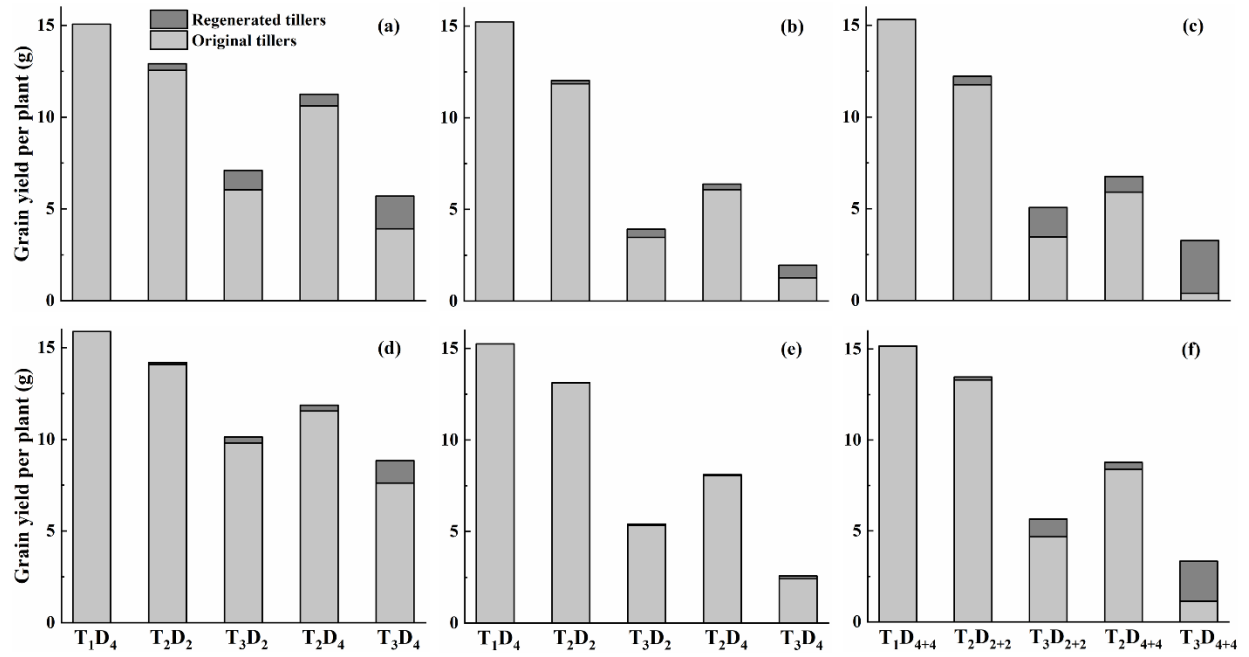

**Figure S5.** Grain yield per plant including original and regenerated tillers under different high-temperature treatments at booting, flowering, and combined stages during the 2016–2017 growing seasons. (a) Huaidao-5 at booting treatment; (b) Huaidao-5 at flowering treatment; (c) Huaidao-5 at combined stages treatment; (d) Wuyunjing-24 at booting treatment; (e) Wuyunjing-24 at flowering treatment; (f) Wuyunjing-24 at combined stages treatment. Different uppercase and lowercase letters indicate significant differences at the 0.05 level for original and regenerated tillers, respectively.

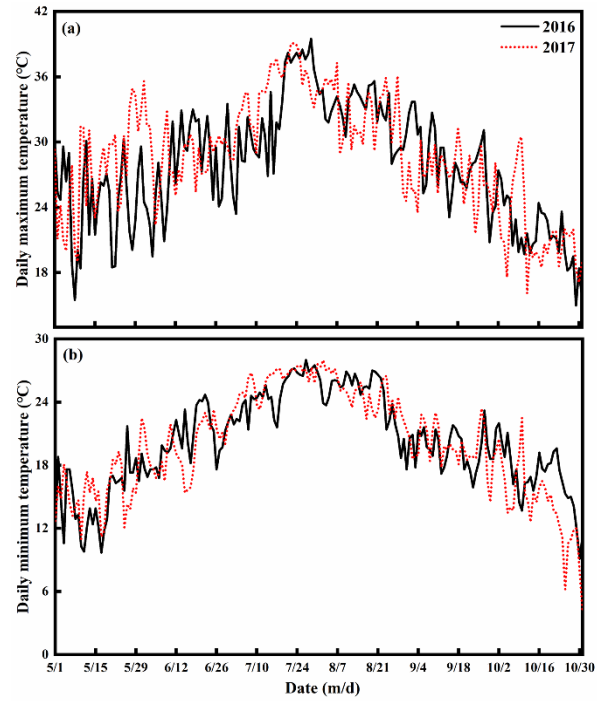

**Figure S6.** Daily (a) maximum and (b) minimum temperatures of the natural environment from May to October during the rice growing seasons 2016–2017.
